# Supplementary material for: WHAM!: a web-based visualization suite for user-defined analysis of metagenomic shotgun sequencing data
Source: PubMed Central journal article supplement (PMC6019711; doi:10.1186/s12864-018-4870-z), 2018-06-25
Supplement: 12864_2018_4870_MOESM1_ESM.pdf [file 12864_2018_4870_MOESM1_ESM.pdf]

**Table S1. Huttenhower Biobakery formatted sample input data input.**

| Acc       | Feature                               | Taxa                                                      | Sample 1 | Sample 2 | Sample 3 | Sample 4 | Sample 5 | Sample 6 | Sample 7 | Sample 8 |
|-----------|---------------------------------------|-----------------------------------------------------------|----------|----------|----------|----------|----------|----------|----------|----------|
| UNGROUPED | UNGROUPED                             | g__Abiotrophia.s__Abiotrophia_defectiva                   | 0        | 0        | 0        | 0        | 332      | 348      | 183      | 281      |
| UNGROUPED | UNGROUPED                             | g__Actinobaculum.s__Actinobaculum_sp_oral_taxon_183       | 0        | 0        | 0        | 0        | 0        | 0        | 0        | 0        |
| UNGROUPED | UNGROUPED                             | g__Actinomyces.s__Actinomyces_graevenitzii                | 0        | 0        | 0        | 0        | 6582     | 5703     | 833      | 2416     |
| UNGROUPED | UNGROUPED                             | g__Actinomyces.s__Actinomyces_johnsonii                   | 0        | 0        | 0        | 0        | 1287     | 828      | 0        | 0        |
| 2001295   | [BP] malonyl-CoA biosynthetic process | g__Streptococcus.s__Streptococcus_intermedius             | 0        | 0        | 0        | 0        | 0        | 2        | 0        | 0        |
| 2001295   | [BP] malonyl-CoA biosynthetic process | g__Streptococcus.s__Streptococcus_mitis_oralis_pneumoniae | 0        | 0        | 0        | 0        | 202      | 230      | 74       | 329      |
| 2001295   | [BP] malonyl-CoA biosynthetic process | g__Streptococcus.s__Streptococcus_parasanguinis           | 0        | 0        | 0        | 0        | 68       | 56       | 11       | 111      |
| 2001295   | [BP] malonyl-CoA biosynthetic process | g__Streptococcus.s__Streptococcus_peroris                 | 0        | 0        | 0        | 0        | 2        | 3        | 0        | 24       |
| 2001295   | [BP] malonyl-CoA biosynthetic process | g__Streptococcus.s__Streptococcus_pseudopneumoniae        | 0        | 0        | 0        | 0        | 0        | 0        | 0        | 0        |
| 2001295   | [BP] malonyl-CoA biosynthetic process | g__Streptococcus.s__Streptococcus_salivarius              | 0        | 0        | 0        | 0        | 67       | 66       | 2        | 44       |
| 2001295   | [BP] malonyl-CoA biosynthetic process | g__Streptococcus.s__Streptococcus_sanguinis               | 0        | 0        | 0        | 0        | 11       | 11       | 0        | 2        |
| 2001295   | [BP] malonyl-CoA biosynthetic process | g__Streptococcus.s__Streptococcus_sp_SK140                | 0        | 0        | 0        | 0        | 0        | 0        | 0        | 56       |
| 2001295   | [BP] malonyl-CoA biosynthetic process | g__Streptococcus.s__Streptococcus_thermophilus            | 0        | 0        | 0        | 0        | 2        | 5        | 0        | 0        |
| 2001295   | [BP] malonyl-CoA biosynthetic process | g__Streptococcus.s__Streptococcus_tigurinus               | 0        | 0        | 0        | 0        | 4        | 5        | 0        | 16       |
| 2001295   | [BP] malonyl-CoA biosynthetic process | g__Streptococcus.s__Streptococcus_vestibularis            | 0        | 0        | 0        | 0        | 0        | 7        | 0        | 0        |
| 2001295   | [BP] malonyl-CoA biosynthetic process | g__Sutterella.s__Sutterella_wadsworthensis                | 0        | 0        | 0        | 0        | 0        | 0        | 0        | 0        |
| 2001295   | [BP] malonyl-CoA biosynthetic process | g__Treponema.s__Treponema_denticola                       | 0        | 0        | 0        | 0        | 0        | 0        | 0        | 0        |
| 2001295   | [BP] malonyl-CoA biosynthetic process | g__Treponema.s__Treponema_lecithinolyticum                | 0        | 0        | 0        | 0        | 0        | 0        | 0        | 0        |
| 2001295   | [BP] malonyl-CoA biosynthetic process | g__Treponema.s__Treponema_medium                          | 0        | 0        | 0        | 0        | 0        | 0        | 0        | 0        |
| 2001295   | [BP] malonyl-CoA biosynthetic process | unclassified                                              | 0        | 0        | 0        | 0        | 60       | 63       | 0        | 120      |
