# Supplementary material for: WHAM!: a web-based visualization suite for user-defined analysis of metagenomic shotgun sequencing data
Source: PubMed Central journal article supplement (PMC6019711; doi:10.1186/s12864-018-4870-z), 2018-06-25
Supplement: 12864_2018_4870_MOESM2_ESM.pdf [file 12864_2018_4870_MOESM2_ESM.pdf]

**Table S2. EBI Metagenomics formatted sample input data input**

| <b>a</b> | <b>Acc</b> | <b>Feature</b>                                               | <b>Sample 1</b> | <b>Sample 2</b> | <b>Sample 3</b> | <b>Sample 4</b> | <b>Sample 5</b> | <b>Sample 6</b> | <b>Sample 7</b> | <b>Sample 8</b> |
|----------|------------|--------------------------------------------------------------|-----------------|-----------------|-----------------|-----------------|-----------------|-----------------|-----------------|-----------------|
|          | IPR000011  | Ubiquitin/SUMO-activating enzyme E1                          | 0               | 0               | 0               | 0               | 0               | 0               | 0               | 0               |
|          | IPR000014  | PAS domain                                                   | 699             | 289             | 668             | 137             | 1364            | 1254            | 418             | 518             |
|          | IPR000015  | Outer membrane usher protein                                 | 11075           | 13314           | 1675            | 8               | 34255           | 33647           | 15053           | 16385           |
|          | IPR000021  | Hok/gef cell toxic protein                                   | 630             | 457             | 82              | 0               | 522             | 505             | 509             | 592             |
|          | IPR000022  | Carboxyl transferase                                         | 140             | 2186            | 740             | 3295            | 556             | 494             | 916             | 593             |
|          | IPR000023  | Phosphofructokinase domain                                   | 1683            | 954             | 2041            | 955             | 1760            | 1721            | 1484            | 2280            |
|          | IPR000026  | Guanine-specific ribonuclease N1/T1/U2                       | 15              | 2               | 98              | 14              | 0               | 0               | 2               | 15              |
|          | IPR000031  | PurE domain                                                  | 1426            | 1189            | 1832            | 1690            | 1240            | 1244            | 829             | 861             |
|          | IPR000032  | Phosphocarrier protein HPr-like                              | 1511            | 1988            | 1164            | 1007            | 1650            | 1685            | 1549            | 2244            |
|          | IPR000035  | Alkylbase DNA glycosidase, conserved site                    | 47              | 46              | 0               | 0               | 146             | 111             | 97              | 117             |
|          | IPR000036  | Peptidase A26, ompTn                                         | 470             | 0               | 0               | 0               | 152             | 100             | 103             | 15              |
|          | IPR000037  | SsrA-binding protein                                         | 513             | 657             | 735             | 843             | 542             | 511             | 477             | 505             |
|          | IPR000043  | Adenosylhomocysteinase                                       | 2               | 62              | 46              | 20              | 107             | 102             | 76              | 54              |
|          | IPR000045  | Prepilin type IV endopeptidase, peptidase domain             | 395             | 356             | 225             | 62              | 888             | 898             | 709             | 914             |
|          | IPR000049  | Electron transfer flavoprotein, beta-subunit, conserved site | 79              | 8               | 0               | 1               | 11              | 13              | 17              | 0               |
|          | IPR000055  | Restriction endonuclease, type I, HsdS                       | 641             | 583             | 609             | 1174            | 802             | 860             | 309             | 318             |
|          | IPR000056  | Ribulose-phosphate 3-epimerase-like                          | 1804            | 2762            | 3003            | 2831            | 1580            | 1513            | 2655            | 2696            |
|          | IPR000058  | Zinc finger, AN1-type                                        | 0               | 2               | 0               | 0               | 0               | 0               | 6               | 0               |
|          | IPR000059  | NUDIX hydrolase, NudL, conserved site                        | 64              | 30              | 40              | 4               | 145             | 133             | 91              | 117             |
|          | IPR000060  | BCCT transporter family                                      | 8085            | 1115            | 2664            | 3735            | 9349            | 9267            | 2328            | 3560            |

**Supplementary Table 2. EBI Metagenomics formatted sample input data input**

| <b>b</b> | Taxa                                                                                                                               | Sample 1 | Sample 2 | Sample 3 | Sample 4 | Sample 5 | Sample 6 | Sample 7 |
|----------|------------------------------------------------------------------------------------------------------------------------------------|----------|----------|----------|----------|----------|----------|----------|
|          | Root                                                                                                                               | 1251     | 1832     | 1238     | 2255     | 1760     | 1693     | 1595     |
|          | Root;k__Bacteria;p__Acidobacteria;c__Acidobacteria-6;o__iii1-15;f__g__s__                                                          | 0        | 0        | 1        | 0        | 0        | 0        | 0        |
|          | Root;k__Bacteria;p__Actinobacteria;c__Acidimicrobiia;o__Acidimicrobiales;f__C111;g__s__                                            | 0        | 0        | 1        | 0        | 0        | 0        | 0        |
|          | Root;k__Bacteria;p__Actinobacteria;c__Actinobacteria;o__Actinomycetales;f__g__s__                                                  | 0        | 9        | 4        | 8        | 0        | 0        | 2        |
|          | Root;k__Bacteria;p__Actinobacteria;c__Actinobacteria;o__Actinomycetales;f__ACK-M1;g__s__                                           | 0        | 0        | 0        | 1        | 0        | 0        | 0        |
|          | Root;k__Bacteria;p__Actinobacteria;c__Actinobacteria;o__Actinomycetales;f__Actinomycetaceae;g__Actinomyces;s__                     | 0        | 13       | 0        | 17       | 0        | 0        | 0        |
|          | Root;k__Bacteria;p__Actinobacteria;c__Actinobacteria;o__Actinomycetales;f__Actinomycetaceae;g__Arcanobacterium;s__                 | 0        | 0        | 1        | 0        | 0        | 0        | 0        |
|          | Root;k__Bacteria;p__Actinobacteria;c__Actinobacteria;o__Actinomycetales;f__Actinomycetaceae;g__Varibaculum;s__                     | 0        | 0        | 0        | 2        | 0        | 0        | 5        |
|          | Root;k__Bacteria;p__Actinobacteria;c__Actinobacteria;o__Actinomycetales;f__Actinospicaceae;g__s__                                  | 0        | 0        | 2        | 0        | 0        | 0        | 0        |
|          | Root;k__Bacteria;p__Actinobacteria;c__Actinobacteria;o__Actinomycetales;f__Brevibacteriaceae;g__Brevibacterium;s__                 | 0        | 0        | 0        | 0        | 0        | 0        | 0        |
|          | Root;k__Bacteria;p__Actinobacteria;c__Actinobacteria;o__Actinomycetales;f__Cellulomonadaceae;g__s__                                | 0        | 1        | 0        | 0        | 0        | 0        | 0        |
|          | Root;k__Bacteria;p__Actinobacteria;c__Actinobacteria;o__Actinomycetales;f__Cellulomonadaceae;g__Cellulomonas;s__                   | 0        | 0        | 0        | 0        | 0        | 0        | 0        |
|          | Root;k__Bacteria;p__Actinobacteria;c__Actinobacteria;o__Actinomycetales;f__Corynebacteriaceae;g__Corynebacterium;s__               | 0        | 36       | 623      | 61       | 0        | 0        | 24       |
|          | Root;k__Bacteria;p__Actinobacteria;c__Actinobacteria;o__Actinomycetales;f__Corynebacteriaceae;g__Corynebacterium;s__aurimucosum    | 0        | 0        | 42       | 0        | 0        | 0        | 0        |
|          | Root;k__Bacteria;p__Actinobacteria;c__Actinobacteria;o__Actinomycetales;f__Corynebacteriaceae;g__Corynebacterium;s__kroppenstedtii | 0        | 0        | 0        | 0        | 0        | 0        | 0        |
|          | Root;k__Bacteria;p__Actinobacteria;c__Actinobacteria;o__Actinomycetales;f__Corynebacteriaceae;g__Corynebacterium;s__pilosum        | 0        | 0        | 1        | 0        | 0        | 0        | 0        |
|          | Root;k__Bacteria;p__Actinobacteria;c__Actinobacteria;o__Actinomycetales;f__Corynebacteriaceae;g__Corynebacterium;s__stationis      | 0        | 0        | 26       | 0        | 0        | 0        | 0        |
|          | Root;k__Bacteria;p__Actinobacteria;c__Actinobacteria;o__Actinomycetales;f__Dermabacteraceae;g__Dermabacter;s__                     | 0        | 1        | 0        | 0        | 0        | 0        | 0        |
|          | Root;k__Bacteria;p__Actinobacteria;c__Actinobacteria;o__Actinomycetales;f__Microbacteriaceae;g__s__                                | 0        | 1        | 0        | 0        | 0        | 0        | 0        |
|          | Root;k__Bacteria;p__Actinobacteria;c__Actinobacteria;o__Actinomycetales;f__Microbacteriaceae;g__CandidatusRhodoluna;s__            | 0        | 1        | 0        | 1        | 0        | 0        | 1        |
